# Supplementary material for: Improved Diagnostic Accuracy of Ameloblastoma and Odontogenic Keratocyst on Cone-Beam CT by Artificial Intelligence
Source: PubMed Central journal article supplement (PMC8828501; doi:10.3389/fonc.2021.793417), 2022-01-27
Supplement: Image_1.pdf [file Image_1.pdf]

## *Supplementary Material*

### 1.1 Supplementary Figures

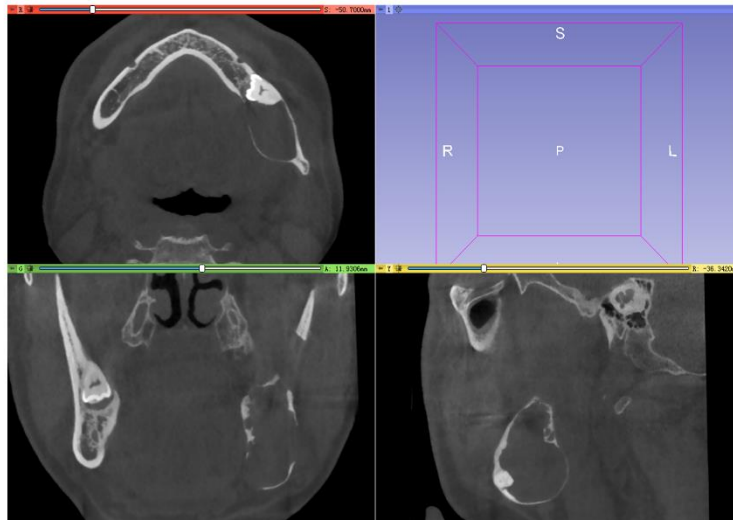

**Supplementary Figure 1.** Picture comprising three views of CBCT were offered for testing surgeons.
